# Supplementary material for: Thermoelectric Properties of Cotton Fabrics Dip-Coated in Pyrolytically Stripped Pyrograf® III Carbon Nanofiber Based Aqueous Inks
Source: MDPI journal article supplement (doi:10.3390/ma16124335), 2023-06-12
Supplement: s1 [file s1]

## Supporting Information

# Thermoelectric Properties of Cotton Fabrics Dip-Coated in Pyrolytically Stripped Pyrograf<sup>®</sup> III Carbon Nanofiber Based Aqueous Inks

Antonio J. Paleo <sup>1,\*</sup>, Beate Krause <sup>2</sup>, Maria F. Cerqueira <sup>3,4</sup>, Jose M. González-Domínguez <sup>5</sup>,  
Enrique Muñoz <sup>6</sup>, Petra Pötschke <sup>2</sup> and Ana M. Rocha <sup>1</sup>

- <sup>1</sup> 2C2T-Centre for Textile Science and Technology, University of Minho, Campus de Azurém, 4800-058 Guimarães, Portugal; amrocha@det.uminho.pt  
<sup>2</sup> Leibniz-Institut für Polymerforschung Dresden e.V. (IPF), Hohe Str. 6, 01069 Dresden, Germany; krause-beate@ipfdd.de (B.K.); poe@ipfdd.de (P.P.)  
<sup>3</sup> INL-International Iberian Nanotechnology Laboratory, Av. Mestre. Jose Veiga, 4715-330 Braga, Portugal; fcerqueira@fisica.uminho.pt  
<sup>4</sup> CFUM-Center of Physics of the University of Minho, Campus de Gualtar, 4710-057 Braga, Portugal  
<sup>5</sup> Instituto de Carboquímica ICB-CSIC, C/Miguel Luesma Castán 4, 50018 Zaragoza, Spain; jmgonzalez@icb.csic.es  
<sup>6</sup> Facultad de Física, Pontificia Universidad Católica de Chile, Santiago 7820436, Chile; munoztavera@gmail.com  
\* Correspondence: ajpaleovieito@2c2t.uminho.pt

### 3.2. Raman analysis of as-received CNFs and dip-coated textiles

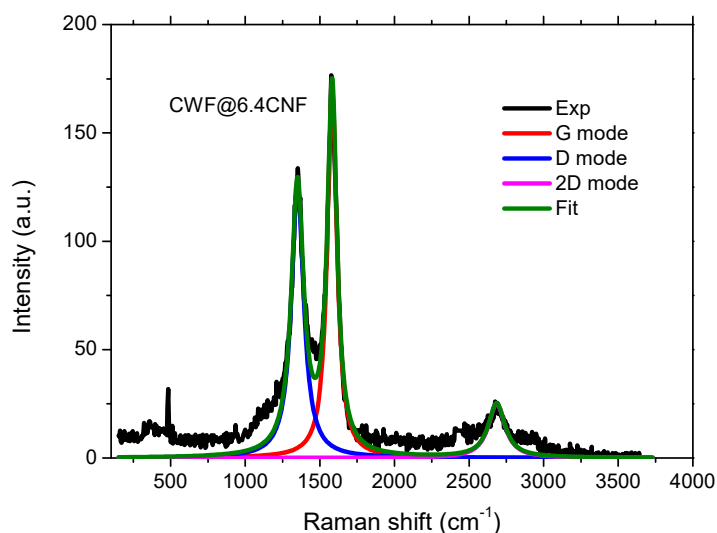

**Figure S1.** Example of the deconvolutions performed for parameters shown in Table 1.

### 3.3. XPS analysis of as-received CNFs and dip-coated textiles

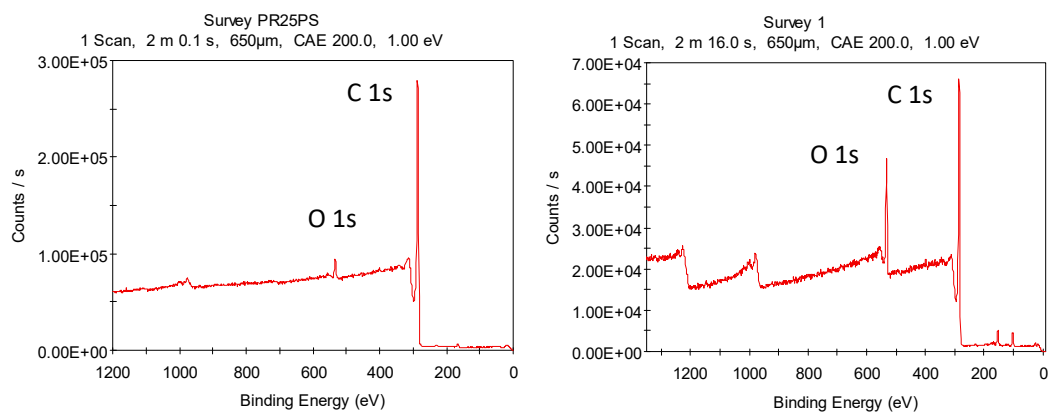

**Figure S2.** XPS survey spectra for CNFs (left) and the CWF@1.6CNF thermoelectric textile (right).

**Table S1.** XPS quantitative information extracted from the survey spectra displayed in Figure S1.

| Sample     | Composition (at%) |      |   |     |     |
|------------|-------------------|------|---|-----|-----|
|            | C                 | O    | S | N   | Si  |
| CNFs       | 96                | 3    | 1 | 0   | 0   |
| CWF@1.6CNF | 78.1              | 15.9 | 0 | 1.6 | 4.4 |
